# Supplementary material for: Unifying theoretical framework for deciphering the oxygen reduction reaction on platinum
Source: Royal Society of Chemistry journal article supplement (doi:10.1039/c8cp01315b), 2018-01-01
Supplement: c8cp01315b1.pdf [file c8cp01315b1.pdf]

## SUPPORTING INFORMATION

### **Unifying theoretical framework for deciphering the oxygen reduction reaction on platinum**

*Jun Huang,<sup>1,2,z</sup> Jianbo Zhang,<sup>2,3</sup> Michael Eikerling<sup>4</sup>*

<sup>1</sup> College of Chemistry and Chemical Engineering, Central South University,  
Changsha 410083, PR China

<sup>2</sup> Department of Automotive Engineering, State Key Laboratory of Automotive  
Safety and Energy, Tsinghua University, Beijing 100084, China

<sup>3</sup> Beijing Co-innovation Center for Electric Vehicles, Beijing Institute of  
Technology, Beijing 100081, China

<sup>4</sup> Department of Chemistry, Simon Fraser University, Burnaby, BC V5A 1S6,  
Canada

Corresponding authors: [jhuangelectrochem@qq.com](mailto:jhuangelectrochem@qq.com)

### ***Lateral interaction effect***

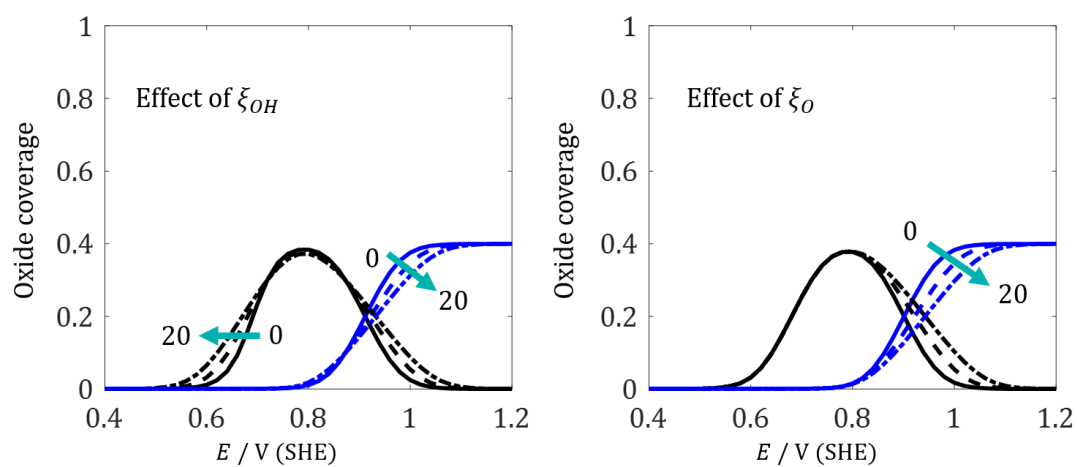

Figure S 1. Effect of  $\xi_{OH}$  on the coverage of adsorbed oxygen intermediates (left) with  $\xi_O = 10$  kJ mol<sup>-1</sup>. Effect of  $\xi_O$  on the coverage of adsorbed oxygen intermediates (right) with  $\xi_{OH} = 10$  kJ mol<sup>-1</sup>. Other parameters are given in Figure 2 of the main-text.

## Interfacial parameters

Table S1. Parameters of the electrified interface in calculation of  $\sigma_M$ .

| Category                  | Item                                                                    | Value                                     | Note                                                                   |
|---------------------------|-------------------------------------------------------------------------|-------------------------------------------|------------------------------------------------------------------------|
| General                   | Gas constant, $R$                                                       | $8.314 \text{ J K}^{-1} \text{ mol}^{-1}$ | Constant                                                               |
|                           | Faraday constant, $F$                                                   | $96485 \text{ C mol}^{-1}$                | Constant                                                               |
|                           | Temperature, $T$                                                        | $298.15 \text{ K}$                        | Typical value                                                          |
|                           | Elementary charge, $e$                                                  | $1.6 \times 10^{-19} \text{ C}$           | Constant                                                               |
|                           | Avogadro's number, $N_A$                                                | $6.02 \times 10^{23} \text{ mol}^{-1}$    | Constant                                                               |
|                           | Water dipole moment, $\mu_w$                                            | $3.1 \text{ D}$                           | Typical value                                                          |
|                           | Pt atom density, $N_{\text{tot}}$                                       | $1.6335 \times 10^{19} \text{ m}^{-2}$    | Calculated using $4/\sqrt{3}a_{pt}^2$ with $a_{pt} = 3.92 \text{ \AA}$ |
|                           | Vacuum permittivity, $\epsilon_0$                                       | $8.85 \times 10^{-12} \text{ F m}^{-1}$   | Constant                                                               |
| Dielectric and structural | Permittivity of oxide layer, $\epsilon_{\text{PtO}}$                    | $1.0 \epsilon_0$                          | Nothing but vacuum inside the oxide layer                              |
|                           | Permittivity of the IHP, $\epsilon_{\text{IHP}}$                        | $06.0 \epsilon_0$                         | <sup>1</sup>                                                           |
|                           | Permittivity of the OHP, $\epsilon_{\text{OHP}}$                        | $30.0 \epsilon_0$                         | <sup>1</sup>                                                           |
|                           | Permittivity of bulk solution, $\epsilon_s$                             | $78.5 \epsilon_0$                         | Constant (bulk water)                                                  |
|                           | Thickness of the oxide layer, $\delta_{\text{PtO}}$                     | $0.18 \text{ nm}$                         | DFT calculation <sup>2</sup>                                           |
|                           | Net charge number per oxide site, $\zeta_{\text{OH}}$                   | $0.02$                                    | DFT calculation <sup>2</sup>                                           |
|                           | Thickness of the IHP, $\delta_{\text{IHP}}$                             | $0.275 \text{ nm}$                        | Constant (the diameter of water dipole)                                |
|                           | Thickness of the OHP, $\delta_{\text{OHP}}$                             | $0.515 \text{ nm}$                        | <sup>1</sup>                                                           |
|                           | Potential difference between bulk and interfacial metal, $\Delta\phi_M$ | $0.3 \text{ V}$                           | <sup>1</sup>                                                           |

***A collection of ORR Tafel slopes of Pt electrocatalysts.***

Table S2. A collection of ORR Tafel slopes of Pt electrocatalysts.

| Sample                                                         | Method & condition                                                                                           | Tafel slope / $\text{mV dec}^{-1}$ | Potential range / V | Potential dependence | Reference |
|----------------------------------------------------------------|--------------------------------------------------------------------------------------------------------------|------------------------------------|---------------------|----------------------|-----------|
| Pt/Vulcan                                                      | RDE, $\text{O}_2$ -saturated<br>0.1M $\text{HClO}_4$ ,<br>mass-transfer<br>corrected                         | 60~90                              | 0.75<br>– 0.95      | Decreasing           | 3         |
| Pt(111)                                                        | RDE, $\text{O}_2$ -saturated<br>0.1M $\text{HClO}_4$                                                         | 77                                 | 0.7 – 0.9           | Not shown            | 4         |
| 50% wt<br>Pt/Vulcan                                            | IR-free voltage of a<br>catalyst layer in<br>$\text{H}_2/\text{O}_2$ gas<br>condition at 100%<br>RH and 80°C | 60 – 110                           | 0.75<br>– 0.90      | Decreasing           | 5         |
| Pt(111)                                                        | RDE, $\text{O}_2$ -saturated<br>0.1M $\text{HClO}_4$ at 296<br>K, intrinsic kinetic<br>current               | ~60<br>– 118                       | 0.5 – 1.0           | Decreasing           | 6         |
| Pt-poly,<br>$\text{Pt}_3\text{Ni}$ ,<br>$\text{Pt}_3\text{Co}$ | RDE, $\text{O}_2$ -saturated<br>0.1M $\text{HClO}_4$ at 293<br>K, mass-transfer<br>corrected                 | 90 – 110                           | 0.80<br>– 0.92      | Decreasing           | 7         |
| Pt disk<br>electrode                                           | RDE, $\text{HClO}_4$ and<br>$\text{H}_2\text{SO}_4$                                                          | 60 – 120                           | 0.4 – 1.0           | Decreasing           | 8         |

### ***Effect of ionic strength***

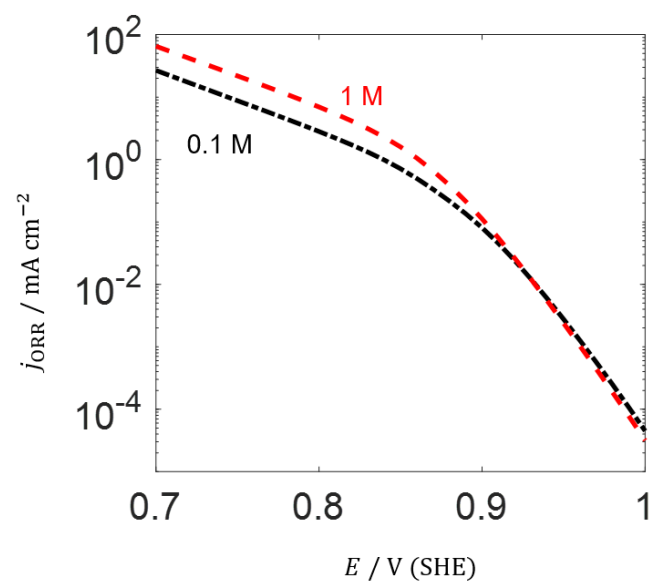

Figure S 2. Effect of ionic strength on the ORR for the case of pH=1.2 in Figure 3.

### Rate constants

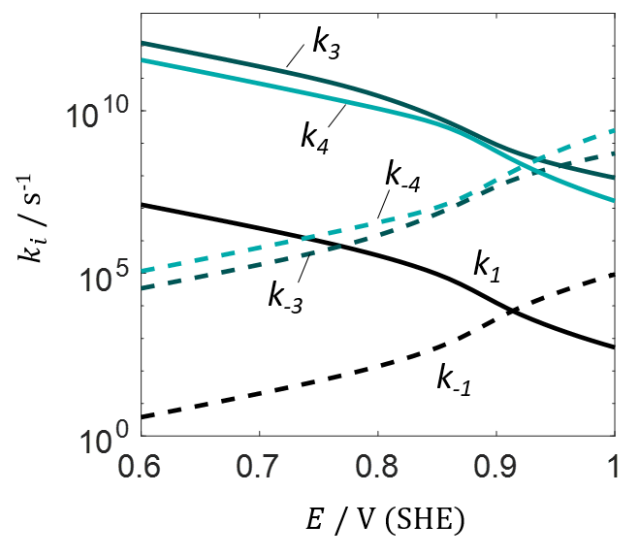

Figure S 3. Variations in the rate constants as a function of electrode potential for  $\text{pH}=1.2$  in Figure 3.

***Oxide coverage as a function of the chemisorption energy***

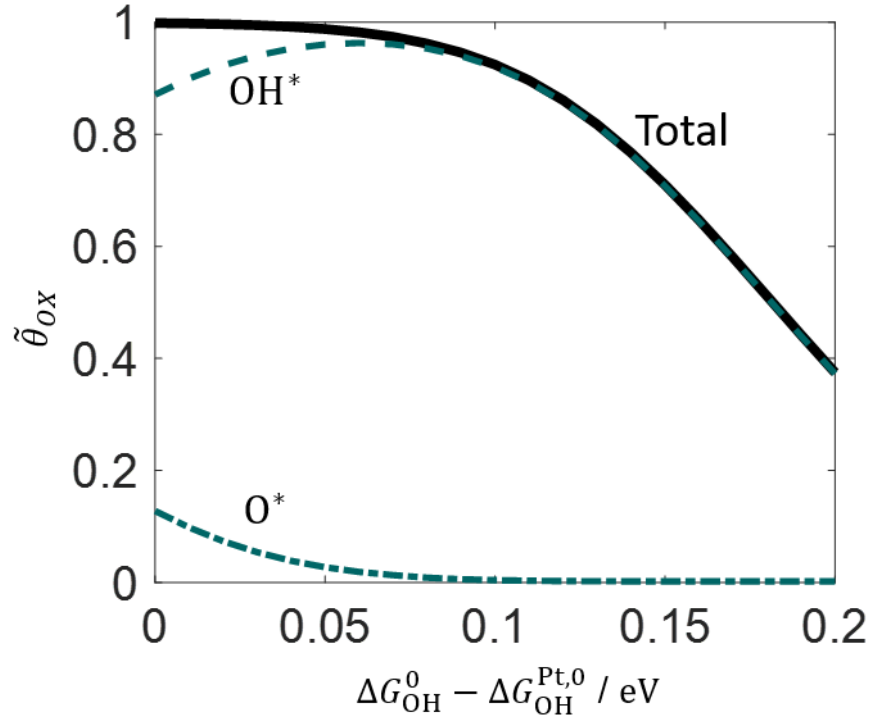

Figure S 4. Normalized total oxide coverage,  $\tilde{\theta}_{\text{ox}} = (\theta_{\text{OH}} + \theta_{\text{O}})/\theta_{\text{max}}$ , as a function of hydroxyl binding energy. The data are calculated at  $E = 0.9 \text{ V}$  (RHE) using the same parameter set as in Figure 7.

### **Relation between ORR activity and $G_{OH}^0$**

According to the definition we obtain,

$$\begin{aligned} K_3^* &= \frac{k_3^*}{k_{-3}} = [H^+] \exp\left(\frac{E_{a,-3} - E_{a,3}}{RT}\right) = [H^+] \exp\left(-\frac{\Delta G_3}{RT}\right) \\ &= [H^+] \exp\left(-\frac{F(E - E_3^{eq}) + \delta G_{OH} - \delta G_O}{RT}\right). \end{aligned} \quad (S1)$$

Based on the scaling relation,  $E_3^{eq}$  of a catalyst having a different  $\Delta G_{OH}^0$  relative to  $\Delta G_{OH}^{Pt,0}$  is expressed as,

$$E_3^{eq} = E_3^{Pt,eq} + \frac{(\zeta_O - 1)(\Delta G_{OH}^0 - \Delta G_{OH}^{Pt,0})}{F}. \quad (S2)$$

where  $E_3^{Pt,eq} = 0.95 \text{ V}$  as in Table 1.

Substituting Eq.(S2) into Eq.(S1) leads to,

$$\begin{aligned} K_3^* &= [H^+] \exp\left(-\frac{F(E - E_3^{Pt,eq})}{4RT}\right) \exp\left(\frac{\delta G_O - \delta G_{OH}}{RT}\right) \exp\left(\frac{F}{eRT} (\zeta_O \right. \\ &\quad \left. - 1)(\Delta G_{OH}^0 - \Delta G_{OH}^{Pt,0})\right) \\ &= K_3^{Pt,*} \exp\left(\frac{1}{RT} (\zeta_O - 1)(\Delta G_{OH}^0 - \Delta G_{OH}^{Pt,0})\right), \end{aligned} \quad (S3)$$

with  $K_3^{Pt,*} = [H^+] \exp\left(-\frac{F(E - E_3^{Pt,eq})}{RT}\right) \exp\left(\frac{\delta G_O - \delta G_{OH}}{RT}\right).$

Similarly, we have,

$$K_4^* = K_4^{Pt,*} \exp\left(\frac{(\Delta G_{OH}^0 - \Delta G_{OH}^{Pt,0})}{RT}\right), \quad (S4)$$

with  $K_4^{Pt,*} = [H^+] \exp\left(-\frac{F(E - E_4^{Pt,eq})}{RT}\right) \exp\left(\frac{-\delta G_{OH}}{RT}\right).$

For step (1),



$$k_1^* = k_1^{\text{Pt},*} \exp\left(\frac{-\beta_1 \zeta_{\text{OOH}}(\Delta G_{\text{OH}}^0 - \Delta G_{\text{OH}}^{\text{Pt},0})}{RT}\right), \quad (\text{S5})$$

$$\text{with } k_1^{\text{Pt},*} = k_1^0 \exp\left(\frac{-E_{\text{a},1}^0 - \beta_1 F(E - E_1^{\text{Pt,eq}})}{RT}\right) [\text{O}_2][\text{H}^+].$$

For step (3),

$$k_3^* = k_3^{\text{Pt},*} \exp\left(\frac{\beta_3(\zeta_{\text{O}} - 1)(\Delta G_{\text{OH}}^0 - \Delta G_{\text{OH}}^{\text{Pt},0})}{RT}\right), \quad (\text{S6})$$

$$\text{with } k_3^{\text{Pt},*} = k_3^0 \exp\left(\frac{-E_{\text{a},3}^0 - \beta_3 F(E - E_3^{\text{Pt,eq}})}{RT}\right) \theta_{\text{O}}[\text{H}^+].$$

For step (4),

$$k_4^* = k_4^{\text{Pt},*} \exp\left(\frac{\beta_4(\Delta G_{\text{OH}}^0 - \Delta G_{\text{OH}}^{\text{Pt},0})}{RT}\right), \quad (\text{S7})$$

$$\text{with } k_4^{\text{Pt},*} = k_4^0 \exp\left(\frac{-E_{\text{a},4}^0 - \beta_4 F(E - E_4^{\text{Pt,eq}})}{RT}\right) \theta_{\text{OH}}[\text{H}^+].$$

Combining Eqs. (S3)-(S7) into the relation  $v_{\text{ORR}} = (K_3^*)^\nu (K_4^*)^\mu k_i^*$  gives,

$$v_{\text{ORR}} = v_{\text{ORR}}^0 \exp\left(\frac{(\nu(\zeta_{\text{O}} - 1) + \mu - \zeta_i)}{RT} (\Delta G_{\text{OH}}^0 - \Delta G_{\text{OH}}^{\text{Pt},0})\right), \quad (\text{S8})$$

with  $v_{\text{ORR}}^0 = (K_3^{\text{Pt},*})^\nu (K_4^{\text{Pt},*})^\mu k_i^{\text{Pt},*}$  and

$$\zeta_i = \begin{cases} \beta_1 \zeta_{\text{OOH}}, & i = 1 \\ -\beta_3(\zeta_{\text{O}} - 1), & i = 3, \\ -\beta_4, & i = 4 \end{cases} \quad (\text{S9})$$

## Rate determining term

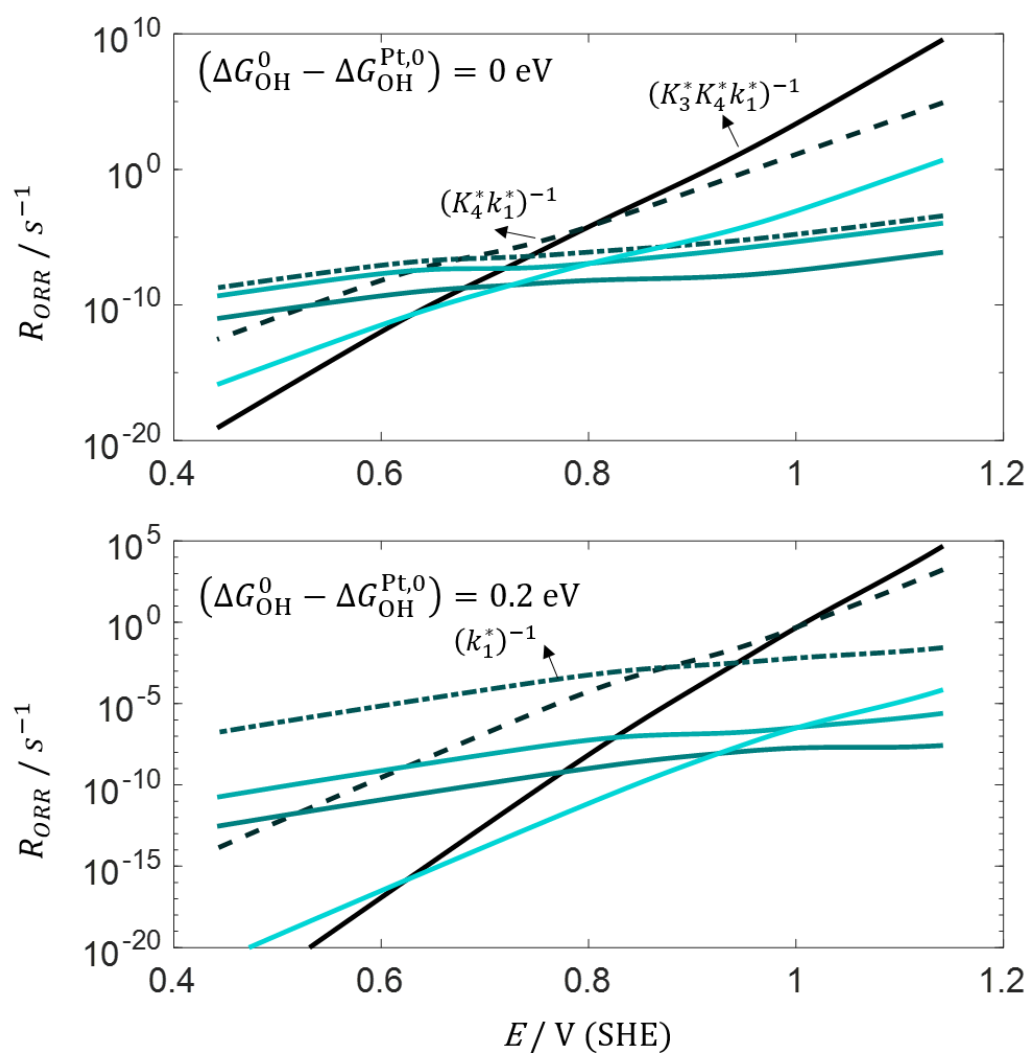

Figure S 5. Rate-determining term of the ORR rate expression for  $(\Delta G_{OH}^0 - \Delta G_{OH}^{Pt,0}) = 0$  and 0.2 eV. Labels for the curves are the same as in Figure 5.

## References

1. J. Huang, A. Malek, J. Zhang and M. H. Eikerling, *The Journal of Physical Chemistry C*, 2016, **120**, 13587-13595.
2. A. Malek and M. H. Eikerling, *Electrocatalysis*, 2017, DOI: 10.1007/s12678-017-0436-0.
3. E. J. Coleman and A. C. Co, *ACS Catalysis*, 2015, **5**, 7299-7311.
4. A. M. Gomez-Marin, R. Rizo and J. M. Feliu, *Catalysis Science & Technology*, 2014, **4**, 1685-1698.
5. N. P. Subramanian, T. Greszler, J. Zhang, W. Gu and R. R. Makharia, *ECS Transactions*, 2011, **41**,

985-1007.

6. J. X. Wang, J. Zhang and R. R. Adzic, *The Journal of Physical Chemistry A*, 2007, **111**, 12702-12710.
7. N. Markovic, T. Schmidt, V. Stamenkovic and P. Ross, *FUEL CELLS-WEINHEIM-*, 2001, **1**, 105-116.
8. D. B. Sepa, M. V. Vojnovic and A. Damjanovic, *Electrochimica Acta*, 1981, **26**, 781-793.
